# Supplementary material for: In-school eyecare in special education settings has measurable benefits for children’s vision and behaviour
Source: PubMed Central journal article supplement (PMC6675062; doi:10.1371/journal.pone.0220480), 2019-08-01
Supplement: pone.0220480.s001.pdf [file pone.0220480.s001.pdf]

| PAID  | Visits | Age   | Gender | ParentQ | PrevEyeT | WhereEyesT | Present | TeachparentIMP | MOD | LD | Autism | CP | Down | CTN | CTD | Stereoinit | CS    | VAtestD | PREVA  | VAtestN | BINOCN | Foc25 | Cyclo | RSER  | LSER  | ClinicallyS2 | Tracking | NPCinit | OcularDEF | Nystagmus | ParEyeProbs | HomeMod | TeachGret | TeachEP | TeachMod |   |   |   |   |   |   |   |   |   |
|-------|--------|-------|--------|---------|----------|------------|---------|----------------|-----|----|--------|----|------|-----|-----|------------|-------|---------|--------|---------|--------|-------|-------|-------|-------|--------------|----------|---------|-----------|-----------|-------------|---------|-----------|---------|----------|---|---|---|---|---|---|---|---|---|
| SP001 | 2      | 8.42  | 0      | 1       | 1        | 1          | 0       | 0              | 2   | 3  | 0      | 0  | 0    | 0   | 0   | 0          | 0     | 4       | 0.200  | 0       | 0      | 4.00  | 1     | 1.00  | 1.00  | 0            | 0        | 5       | 11        | 0         | 0           | 0       | 0         | 0       | 0        |   |   |   |   |   |   |   |   |   |
| SP002 | 2      | 8.92  | 1      | 1       | 1        | 1          | 1       | 1              | 2   | 2  | 3      | 1  | 0    | 0   | 2   | 2          | 0     | 3       | 0.200  | 1       | 0.400  | 2.50  | 1     | 2.50  | 2.50  | 0            | 0        | 5       | 0         | 0         | 0           | 0       | 0         | 1       | 0        | 0 |   |   |   |   |   |   |   |   |
| SP003 | 2      | 8.42  | 0      | 0       | 0        | 0          | 0       | 0              | 2   | 2  | 3      | 0  | 0    | 1   | 0   | 0          | 0     | 3       | 33.33  | 3       | 0.200  | 1     | 0.300 | 3.33  | 1     | 0.300        | 0        | 0       | 9         | 8         | 0           | 0       | 0         | 0       | 1        | 0 | 0 |   |   |   |   |   |   |   |
| SP004 | 2      | 7.67  | 0      | 1       | 1        | 1          | 1       | 1              | 2   | 3  | 0      | 0  | 0    | 2   | 2   | 0          | 16.67 | 3       | 0.400  | 1       | 0.600  | 4.00  | 1     | -0.50 | -0.75 | 0            | 0        | 5       | 11        | 0         | 0           | 1       | 1         | 1       | 0        | 0 |   |   |   |   |   |   |   |   |
| SP005 | 2      | 7.25  | 0      | 1       | 1        | 1          | 1       | 1              | 2   | 3  | 0      | 0  | 0    | 1   | 1   | 0          | 33.33 | 2       | 0.200  | 0       | 4.00   | 0     | 4.00  | 0     | 2.00  | 2.00         | 1        | 0       | 0         | 0         | 0           | 0       | 1         | 1       | 0        | 0 |   |   |   |   |   |   |   |   |
| SP006 | 1      | 7.42  | 1      | 1       | 1        | 1          | 1       | 1              | 2   | 3  | 0      | 0  | 0    | 0   | 0   | 0          | 3     | 100.00  | 3      | 0.100   | 1      | 0.200 | 4.00  | 1     | -0.50 | -0.50        | 0        | 0       | 0         | 0         | 0           | 0       | 0         | 0       | 1        | 0 | 0 |   |   |   |   |   |   |   |
| SP007 | 2      | 7.92  | 1      | 1       | 1        | 1          | 1       | 1              | 2   | 3  | 0      | 0  | 0    | 0   | 0   | 0          | 3     | 50.00   | 3      | 0.300   | 1      | 0.300 | 3.33  | 1     | 0.300 | 3.33         | 0        | 0       | 0         | 0         | 0           | 0       | 0         | 0       | 0        | 1 | 0 | 0 |   |   |   |   |   |   |
| SP008 | 2      | 7.17  | 0      | 1       | 1        | 1          | 1       | 1              | 2   | 3  | 0      | 0  | 0    | 0   | 0   | 0          | 3     | 50.00   | 4      | 0.000   | 1      | 0.500 | 4.00  | 1     | -0.50 | 0.50         | 0        | 0       | 0         | 0         | 0           | 0       | 0         | 0       | 0        | 0 | 1 | 0 | 0 |   |   |   |   |   |
| SP009 | 2      | 5.42  | 1      | 1       | 1        | 1          | 1       | 1              | 0   | 2  | 3      | 0  | 0    | 2   | 2   | 0          | 16.67 | 2       | 0.000  | 0       | 2.94   | 1     | 0.00  | 0.00  | 1     | 0            | 0        | 0       | 0         | 0         | 0           | 0       | 1         | 1       | 1        | 1 | 1 |   |   |   |   |   |   |   |
| SP010 | 2      | 5.50  | 1      | 1       | 1        | 1          | 1       | 0              | 1   | 3  | 3      | 0  | 1    | 0   | 0   | 0          | 16.67 | 2       | 0.400  | 0       | 4.00   | 0     | 4.00  | 0     | 0.25  | 0.25         | 1        | 0       | 0         | 2         | 0           | 0       | 0         | 0       | 1        | 2 | 0 | 0 |   |   |   |   |   |   |
| SP011 | 2      | 5.42  | 0      | 1       | 1        | 1          | 0       | 0              | 2   | 2  | 3      | 0  | 0    | 2   | 2   | 0          | 1     | 0.920   | 0      | 2.00    | 1      | 4.50  | 4.50  | 1     | 0     | 0            | 0        | 0       | 0         | 0         | 0           | 0       | 0         | 0       | 1        | 1 | 1 | 1 |   |   |   |   |   |   |
| SP012 | 2      | 5.67  | 1      | 1       | 1        | 1          | 0       | 0              | 0   | 2  | 1      | 0  | 0    | 0   | 0   | 0          | 2     | 1.200   | 0      | 4.00    | 1      | 4.00  | 1     | 3.00  | 3.00  | 0            | 0        | 9       | 0         | 0         | 0           | 0       | 0         | 0       | 0        | 1 | 0 | 0 |   |   |   |   |   |   |
| SP013 | 2      | 7.08  | 1      | 1       | 1        | 1          | 1       | 1              | 2   | 2  | 3      | 0  | 1    | 0   | 0   | 0          | 1     | 3       | 3.00   | 1       | 0.400  | 4.00  | 1     | 3.00  | 3.00  | 1            | 0        | 5       | 0         | 0         | 0           | 0       | 0         | 0       | 0        | 1 | 0 | 0 |   |   |   |   |   |   |
| SP014 | 2      | 9.92  | 0      | 1       | 1        | 1          | 0       | 0              | 2   | 3  | 0      | 0  | 0    | 0   | 0   | 0          | 50.00 | 3       | 0.200  | 0       | 4.00   | 1     | -0.25 | -0.25 | 0     | 0            | 0        | 0       | 0         | 0         | 0           | 0       | 0         | 0       | 1        | 0 | 0 | 0 |   |   |   |   |   |   |
| SP015 | 2      | 6.00  | 1      | 1       | 1        | 1          | 0       | 0              | 2   | 3  | 0      | 0  | 0    | 0   | 0   | 0          | 12.00 | 2       | 0.200  | 0       | 4.00   | 1     | 1.00  | 0.00  | 0     | 0            | 0        | 0       | 0         | 0         | 0           | 0       | 0         | 0       | 0        | 1 | 0 | 0 | 0 |   |   |   |   |   |
| SP016 | 2      | 6.33  | 1      | 1       | 1        | 1          | 0       | 0              | 2   | 2  | 1      | 0  | 0    | 0   | 0   | 0          | 1     | 50.00   | 2      | 0.100   | 0      | 4.00  | 1     | 1.00  | 1.00  | 0            | 0        | 0       | 0         | 0         | 0           | 0       | 0         | 0       | 0        | 0 | 1 | 0 | 0 | 0 |   |   |   |   |
| SP017 | 2      | 18.33 | 1      | 1       | 1        | 1          | 1       | 1              | 2   | 8  | 0      | 0  | 2    | 2   | 0   | 0          | 3     | 0.500   | 0      | 4.00    | 1      | 6.50  | 6.50  | 0     | 0     | 0            | 0        | 0       | 0         | 0         | 0           | 0       | 0         | 0       | 0        | 0 | 0 | 0 | 0 | 0 |   |   |   |   |
| SP018 | 4      | 9.67  | 1      | 1       | 1        | 1          | 1       | 1              | 0   | 0  | 0      | 0  | 0    | 0   | 0   | 0          | 50.00 | 2       | 0.000  | 0       | 2.50   | 1     | -0.75 | -0.75 | 1     | 0            | 0        | 11      | 0         | 0         | 0           | 0       | 0         | 0       | 0        | 0 | 0 | 0 | 0 | 0 |   |   |   |   |
| SP019 | 2      | 7.33  | 1      | 2       | 0        | 1          | 0       | 0              | 2   | 2  | 1      | 0  | 0    | 0   | 0   | 5          | 33.33 | 2       | 0.100  | 0       | 4.00   | 1     | 0.25  | 0.00  | 0     | 0            | 0        | 9       | 0         | 0         | 0           | 0       | 0         | 0       | 0        | 1 | 0 | 0 | 0 |   |   |   |   |   |
| SP020 | 2      | 9.83  | 1      | 1       | 1        | 1          | 1       | 0              | 1   | 2  | 1      | 0  | 0    | 0   | 0   | 0          | 33.33 | 2       | 0.100  | 0       | 4.00   | 1     | 1.50  | 1.75  | 0     | 0            | 0        | 0       | 0         | 0         | 0           | 0       | 0         | 0       | 0        | 0 | 1 | 0 | 0 | 0 |   |   |   |   |
| SP021 | 1      | 15.17 | 1      | 1       | 1        | 1          | 1       | 1              | 1   | 2  | 3      | 0  | 1    | 0   | 0   | 0          | 3     | 50.00   | 5      | 0.125   | 2      | 0.050 | 4.00  | 1     | 5.00  | 5.50         | 1        | 0       | 0         | 0         | 0           | 0       | 0         | 0       | 0        | 0 | 0 | 0 | 0 | 0 |   |   |   |   |
| SP022 | 2      | 14.33 | 0      | 1       | 1        | 1          | 2       | -0             | 1   | 2  | 3      | 0  | 0    | 0   | 2   | 2          | 1     | 66.66   | 5      | 0.025   | 2      | 0.150 | 3.00  | 1     | 1.25  | 0.25         | 0        | 0       | 16        | 6         | 0           | 0       | 0         | 0       | 0        | 0 | 0 | 0 | 0 | 0 |   |   |   |   |
| SP023 | 1      | 15.92 | 0      | 1       | 0        | 0          | 0       | 0              | 2   | 2  | 3      | 0  | 0    | 0   | 0   | 0          | 3     | 100.00  | 5      | -0.100  | 2      | 0.000 | 4.00  | 1     | -0.25 | 0.25         | 0        | 0       | 0         | 0         | 0           | 0       | 0         | 0       | 0        | 0 | 0 | 0 | 0 | 0 | 0 |   |   |   |
| SP024 | 1      | 9.75  | 1      | 1       | 1        | 1          | 0       | 0              | 2   | 4  | 1      | 0  | 0    | 0   | 0   | 0          | 2     | 100.00  | 3      | -0.100  | 1      | 0.000 | 4.00  | 1     | -0.25 | -0.50        | 0        | 0       | 0         | 0         | 0           | 0       | 0         | 0       | 0        | 0 | 0 | 0 | 0 | 0 | 0 | 0 |   |   |
| SP025 | 1      | 14.58 | 1      | 1       | 1        | 1          | 0       | 0              | 0   | 2  | 3      | 0  | 1    | 0   | 0   | 0          | 3     | 5       | -0.025 | 2       | 0.025  | 4.00  | 1     | 1.50  | 1.50  | 0            | 0        | 8       | 0         | 0         | 0           | 0       | 0         | 0       | 0        | 0 | 0 | 0 | 0 | 0 | 0 | 0 |   |   |
| SP026 | 2      | 13.67 | 1      | 1       | 1        | 1          | 2       | 1              | 1   | 3  | 3      | 0  | 0    | 0   | 0   | 1          | 66.66 | 5       | -0.075 | 2       | 0.125  | 3.00  | 1     | 0.25  | 0.50  | 0            | 0        | 0       | 0         | 0         | 0           | 0       | 0         | 0       | 0        | 0 | 0 | 0 | 0 | 0 | 0 | 0 |   |   |
| SP027 | 2      | 10.92 | 1      | 1       | 1        | 1          | 1       | 1              | 0   | 0  | 0      | 0  | 0    | 0   | 0   | 0          | 12.50 | 2       | 0.000  | 0       | 2.50   | 1     | 3.50  | 3.50  | 0     | 0            | 0        | 0       | 0         | 0         | 0           | 0       | 0         | 0       | 0        | 0 | 0 | 0 | 0 | 0 | 0 | 0 |   |   |
| SP028 | 3      | 10.75 | 1      | 1       | 1        | 1          | 1       | 0              | 0   | 4  | 1      | 0  | 0    | 0   | 0   | 0          | 2     | 100.00  | 5      | 0.000   | 2      | 0.000 | 4.00  | 0     | 0.25  | 0.50         | 0        | 0       | 9         | 0         | 0           | 0       | 0         | 0       | 0        | 0 | 0 | 0 | 0 | 0 | 0 | 0 | 0 |   |
| SP029 | 2      | 10.58 | 1      | 1       | 1        | 1          | 0       | 0              | 4   | 1  | 0      | 0  | 0    | 0   | 0   | 0          | 1     | 100.00  | 3      | 0.200   | 1      | 0.200 | 4.00  | 1     | 2.50  | 2.25         | 1        | 0       | 0         | 0         | 0           | 0       | 0         | 0       | 0        | 0 | 0 | 0 | 0 | 0 | 0 | 0 | 0 |   |
| SP030 | 2      | 10.83 | 1      | 1       | 1        | 1          | 1       | 0              | 0   | 0  | 1      | 0  | 0    | 0   | 0   | 0          | 3     | 100.00  | 3      | 0.100   | 1      | 0.100 | 4.00  | 1     | 2.00  | 2.00         | 1        | 0       | 0         | 0         | 0           | 0       | 0         | 0       | 0        | 0 | 0 | 0 | 0 | 0 | 0 | 0 | 0 |   |
| SP031 | 2      | 16.58 | 1      | 1       | 1        | 1          | 0       | 0              | 1   | 2  | 3      | 0  | 0    | 0   | 0   | 1          | 33.33 | 2       | 0.100  | 0       | 4.00   | 1     | 0.00  | -0.50 | 0     | 0            | 0        | 7       | 0         | 0         | 0           | 0       | 0         | 0       | 0        | 0 | 0 | 0 | 0 | 0 | 0 | 0 |   |   |
| SP032 | 1      | 16.67 | 0      | 0       | 0        | 0          | 0       | 0              | 1   | 2  | 1      | 0  | 0    | 0   | 0   | 0          | 2     | 0.200   | 0      | 4.00    | 1      | -1.25 | -1.25 | 0     | 0     | 0            | 0        | 0       | 0         | 0         | 0           | 0       | 0         | 0       | 0        | 0 | 0 | 0 | 0 | 0 | 0 | 0 |   |   |
| SP033 | 2      | 14.33 | 0      | 1       | 1        | 1          | 1       | 0              | 0   | 2  | 3      | 0  | 0    | 0   | 0   | 0          | 1     | 2.000   | 0      | 6.67    | 1      | -6.50 | -6.50 | 1     | 0     | 0            | 0        | 0       | 0         | 0         | 0           | 0       | 0         | 0       | 0        | 0 | 0 | 0 | 0 | 0 | 0 | 0 |   |   |
| SP034 | 1      | 5.00  | 1      | 2       | 1        | 2          | 0       | 0              | 1   | 2  | 1      | 0  | 0    | 0   | 0   | 0          | 33.33 | 2       | 0.200  | 0       | 2.00   | 1     | 1.00  | 0.50  | 1     | 0            | 0        | 0       | 0         | 0         | 0           | 0       | 0         | 0       | 0        | 0 | 0 | 0 | 0 | 0 | 0 | 0 | 0 |   |
| SP035 | 1      | 5.08  | 0      | 1       | 1        | 1          | 1       | 0              | 0   | 3  | 3      | 0  | 0    | 0   | 0   | 0          | 2     | 0.000   | 0      | 4.00    | 1      | 0.00  | 0.00  | 0     | 0     | 0            | 0        | 0       | 0         | 0         | 0           | 0       | 0         | 0       | 0        | 0 | 0 | 0 | 0 | 0 | 0 | 0 | 0 |   |
| SP036 | 1      | 9.25  | 0      | 1       | 1        | 1          | 1       | 0              | 2   | 1  | 3      | 1  | 0    | 2   | 2   | 2          | 1     | 0       | 0      | 4.00    | 1      | -3.00 | -3.50 | 1     | 1     | 1            | 1        | 1       | 1         | 1         | 1           | 1       | 1         | 1       | 1        | 1 | 1 | 1 | 1 | 1 | 1 | 0 |   |   |
| SP037 | 1      | 10.92 | 1      | 1       | 1        | 1          | 1       | 0              | 0   | 0  | 0      | 0  | 0    | 0   | 0   | 0          | 8.33  | 2       | 0.100  | 0       | 4.00   | 1     | 1.25  | 0.25  | 0     | 0            | 0        | 0       | 0         | 0         | 0           | 0       | 0         | 0       | 0        | 0 | 0 | 0 | 0 | 0 | 0 | 0 | 0 |   |
| SP038 | 1      | 6.42  | 1      | 1       | 1        | 1          | 1       | 0              | 0   | 1  | 6      | 3  | 0    | 0   | 0   | 1          | 1     | 0       | 0      | 2       | 0.300  | 0     | 1.85  | 1     | 1.25  | 0.75         | 0        | 0       | 0         | 0         | 0           | 0       | 0         | 0       | 0        | 0 | 0 | 0 | 0 | 0 | 0 | 0 | 0 | 0 |
| SP039 | 1      | 5.33  | 0      | 1       | 1        | 1          | 0       | 0              | 0   | 1  | 3      | 0  | 0    | 0   | 1   | 5          | 0     | 0       | 0      | 1       | 0.400  | 0     | 0     | 0     | 0     | 0            | 0        | 0       | 0         | 0         | 0           | 0       | 0         | 0       | 0        | 0 | 0 | 0 | 0 | 0 | 0 | 0 | 0 |   |
| SP040 | 1      | 11.83 | 1      | 1       | 0        | 0          | 0       | 0              | 0   | 7  | 1      | 0  | 0    | 0   | 0   | 0          | 3     | 66.66   | 5      | -0.075  | 2      | 0.025 | 4.00  | 1     | 0.00  | 0.00         | 0        | 0       | 0         | 0         | 0           | 0       | 0         | 0       | 0        | 0 | 0 | 0 | 0 | 0 | 0 | 0 | 0 | 0 |
| SP041 | 1      | 4.50  | 1      | 1       | 1        | 1          | 1       | 0              | 0   | 3  | 1      | 0  | 0    | 0   | 0   | 0          | 2     | 0       | 0      | 0       | 2.00   | 1     | 0.00  | 0.00  | 0     | 0            | 0        | 0       | 0         | 0         | 0           | 0       | 0         | 0       | 0        | 0 | 0 | 0 | 0 | 0 | 0 | 0 | 0 |   |
| SP042 | 1      | 12.50 | 1      | 1       | 1        | 1          | 0       | 0              | 0   | 1  | 2      | 3  | 0    | 0   | 0   | 0          | 3     | 0       | 0      | 1       | 1.300  | 0     | 1     | 0.50  | -0.50 | 0            | 0        | 0       | 0         | 0         | 0           | 0       | 0         | 0       | 0        | 0 | 0 | 0 | 0 | 0 | 0 | 0 | 0 |   |
| SP043 | 2      | 11.33 | 1      | 1       | 1        | 1          | 1       | 0              | 0   | 2  | 2      | 3  | 0    | 0   | 0   | 0          | 3     | 100.00  | 3      | 0.000   | 1      | 0.000 | 4.00  | 1     | -0.25 | 0.00         | 0        | 0       | 0         | 0         | 0           | 0       | 0         | 0       | 0        | 0 | 0 | 0 | 0 | 0 | 0 | 0 | 0 | 0 |
| SP044 | 3      | 10.83 | 1      | 1       | 0        | 0          | 0       | 0              | 0   | 2  | 1      | 0  | 0    | 0   | 0   | 0          | 16.67 | 2       | 0.000  |         |        |       |       |       |       |              |          |         |           |           |             |         |           |         |          |   |   |   |   |   |   |   |   |   |



| ActAdv | TeacherMod | Implemented | ParentRepro | HomeMod | Implemented | TwoGroups | FupPresIS | FupCTD | FupCTN | FupNPC | FupCont | FupDVTest | FupPVAD | FupNVTest | FupPVAN | FupRSER | FupSERS | STEREOFUP | FocA25FUP | DEFDENVV | DEFREFACC | DeFCS | DEPFV | DEFOM | DeFocular | DEFSQUINT | DEFcrowdCvi | TotDEF | COMBireFACC | REDCONTUMN | BVUMN | ODUMN2 |   |   |   |   |   |
|--------|------------|-------------|-------------|---------|-------------|-----------|-----------|--------|--------|--------|---------|-----------|---------|-----------|---------|---------|---------|-----------|-----------|----------|-----------|-------|-------|-------|-----------|-----------|-------------|--------|-------------|------------|-------|--------|---|---|---|---|---|
| 1      |            |             |             |         |             |           | 0         | 0      | 0      | 0      |         | 4         | 0.400   |           |         | 0.50    | 0.50    |           | 4.00      | 0        | 0         | 0     | 0     | 0     | 0         | 0         | 1           | 1      | 0           | 0          | 0     | 0      |   |   |   |   |   |
| 1      |            |             |             |         |             |           | 0         | 0      | 2      | 0      | 50.00   | 3         | 0.500   | 1         | 0.400   | 2.50    | 2.25    | 0         | 2.50      | 1        | 1         | 1     | 0     | 0     | 0         | 1         | 0           | 4      | 1           | 0          | 0     | 0      |   |   |   |   |   |
| 1      |            |             |             |         |             |           | 0         | 0      | 0      | 0      | 33.30   | 5         | 0.200   | 1         | 0.400   | -1.25   | -1.00   | 2         | 4.00      | 0        | 0         | 1     | 0     | 0     | 0         | 0         | 0           | 1      | 0           | 0          | 0     | 0      |   |   |   |   |   |
| 0      |            | 1           |             |         |             |           | 0         | 0      | 2      | 2      | 6       | 50.00     | 3       | 0.400     | 1       | 0.400   | -1.00   | -0.75     | 4.76      | 1        | 0         | 0     | 0     | 0     | 0         | 1         | 0           | 2      | 0           | 0          | 0     | 0      |   |   |   |   |   |
| 1      |            |             |             |         |             |           | 1         | 1      | 1      | 1      |         | 1         | 0.200   |           |         | 2.50    | 2.50    |           | 4.00      | 0        | 1         | 1     | 0     | 0     | 0         | 1         | 1           | 4      | 0           | 0          | 0     | 0      |   |   |   |   |   |
| 0      |            |             |             |         |             |           | 0         | 1      | 0      | 0      |         | 3         | 0.100   | 1         | -0.100  | 0.00    | -0.25   | 3         | 4.00      | 0        | 0         | 0     | 0     | 0     | 0         | 0         | 0           | 0      | 0           | 0          | 0     | 0      | 0 |   |   |   |   |
| 0      |            |             |             |         |             |           | 0         | 0      | 0      | 0      | 2       | 3         | 0.200   | 1         | 0.100   | 0.75    | 0.75    |           | 3.00      | 0        | 0         | 0     | 0     | 0     | 0         | 0         | 0           | 0      | 0           | 0          | 0     | 0      | 0 | 0 |   |   |   |
| 1      |            |             |             |         |             |           | 1         | 1      | 0      | 0      |         | 4         | 0.100   | 1         | 0.100   | 1.00    | 1.00    |           | 4.00      | 1        | 0         | 0     | 0     | 0     | 0         | 0         | 1           | 2      | 1           | 0          | 0     | 0      | 0 |   |   |   |   |
| 1      |            |             |             |         |             |           | 1         | 0      | 1      | 2      | 2       | 6         | 50.00   | 2         | 0.200   |         | -1.50   | -1.75     |           | 3.00     | 0         | 1     | 1     | 0     | 0         | 1         | 0           | 3      | 0           | 0          | 0     | 0      | 0 |   |   |   |   |
| 1      |            |             |             |         |             |           | 1         | 0      | 0      | 0      |         | 2         | 0.400   | 2         | 0.400   | 0.75    | 0.50    | 1         | 2.00      | 1        | 1         | 1     | 0     | 0     | 1         | 0         | 4           | 1      | 1           | 0          | 0     | 0      | 0 |   |   |   |   |
| 1      |            |             |             |         |             |           | 0         | 0      | 1      | 1      |         | 1         | 0.800   |           |         |         |         |           | 2.00      | 1        | 1         | 1     | 0     | 0     | 1         | 1         | 0           | 4      | 1           | 0          | 0     | 0      | 0 |   |   |   |   |
| 0      |            |             |             |         |             |           | 0         | 0      | 0      | 0      |         | 2         | 0.000   |           |         | 0.50    | 0.50    |           | 4.00      | 1        | 0         | 0     | 0     | 0     | 0         | 0         | 0           | 1      | 0           | 0          | 0     | 0      | 0 |   |   |   |   |
| 1      |            |             |             |         |             |           | 1         | 0      | 1      | 0      | 0       | 0         | 0.300   | 1         | 0.400   | 2.50    | 3.00    | 2         | 4.00      | 1        | 1         | 1     | 0     | 0     | 0         | 0         | 0           | 2      | 1           | 0          | 0     | 0      | 0 |   |   |   |   |
| 0      |            |             |             |         |             |           | 0         | 0      | 0      | 0      |         | 4         | 0.100   | 1         | 0.300   | -0.75   | -0.75   |           | 4.00      | 0        | 0         | 0     | 0     | 0     | 0         | 0         | 0           | 0      | 0           | 0          | 0     | 0      | 0 | 0 |   |   |   |
| 1      |            |             |             |         |             |           | 0         | 0      | 0      | 0      |         | 2         | 0.100   | 2         | 0.100   | 0.50    | 0.50    |           | 4.00      | 0        | 0         | 1     | 0     | 0     | 0         | 0         | 0           | 1      | 0           | 0          | 0     | 0      | 0 | 0 |   |   |   |
| 0      |            |             |             |         |             |           | 0         | 0      | 0      | 0      |         | 2         | 0.000   | 2         | 0.000   | 0.50    | 0.50    | 2         | 3.00      | 0        | 0         | 0     | 0     | 0     | 0         | 0         | 0           | 0      | 0           | 0          | 0     | 0      | 0 | 0 |   |   |   |
| 1      |            |             |             |         |             |           | 1         | 0      | 0      | 0      |         | 3         | 0.600   | 1         | 0.300   | 0.25    | 0.50    | 2         | 4.00      | 0        | 0         | 0     | 0     | 0     | 1         | 0         | 0           | 3      | 0           | 0          | 0     | 0      | 0 | 0 |   |   |   |
| 0      |            |             |             |         |             |           | 0         | 0      | 1      | 1      |         | 2         | 0.100   |           |         | -0.75   | -1.00   |           | 4.76      | 0        | 1         | 0     | 0     | 0     | 0         | 1         | 0           | 2      | 0           | 0          | 0     | 0      | 0 | 0 |   |   |   |
| 0      |            |             |             |         |             |           | 0         | 0      | 0      | 0      | 10      |           | 2       | 0.200     |         | 0.25    | 0.00    | 1         | 4.00      | 0        | 0         | 0     | 0     | 0     | 0         | 0         | 0           | 0      | 0           | 0          | 0     | 0      | 0 | 0 |   |   |   |
| 1      |            |             |             |         |             |           | 1         | 0      | 0      | 0      |         | 2         | 0.100   |           |         | 0.50    | 1.50    | 3         | 2.50      | 0        | 0         | 1     | 0     | 0     | 0         | 0         | 0           | 1      | 0           | 0          | 0     | 0      | 0 | 0 |   |   |   |
| 0      |            |             |             |         |             |           | 0         | 0      | 1      | 0      |         | 5         | 0.100   | 2         | 0.050   | 5.00    | 6.50    |           | 4.00      | 0        | 1         | 0     | 0     | 0     | 0         | 0         | 1           | 0      | 0           | 0          | 0     | 0      | 0 | 0 |   |   |   |
| 1      |            |             |             |         |             |           | 1         | 0      | 0      | 2      | 2       | 15        | 5       | 0.125     | 2       | 0.150   | 0.75    | 0.50      |           | 4.00     | 0         | 0     | 0     | 0     | 1         | 1         | 0           | 3      | 0           | 0          | 0     | 0      | 0 | 0 |   |   |   |
| 0      |            |             |             |         |             |           | 0         | 0      | 0      | 0      |         | 5         | 0.300   | 2         | 0.000   | 0.50    | 0.00    |           | 4.00      | 0        | 0         | 0     | 0     | 0     | 0         | 0         | 0           | 0      | 0           | 0          | 0     | 0      | 0 | 0 |   |   |   |
| 0      |            |             |             |         |             |           | 0         | 0      | 0      | 0      |         | 3         | 0.000   |           |         | 0.00    | -0.25   | 1         | 4.00      | 0        | 0         | 0     | 0     | 0     | 0         | 0         | 0           | 0      | 0           | 0          | 0     | 0      | 0 | 0 | 0 |   |   |
| 0      |            |             |             |         |             |           | 0         | 0      | 0      | 0      |         | 5         | -0.025  | 2         | 0.000   | 1.00    | 1.00    |           | 3.00      | 0        | 0         | 0     | 0     | 0     | 0         | 0         | 0           | 0      | 0           | 0          | 0     | 0      | 0 | 0 | 0 |   |   |
| 1      |            |             |             |         |             |           | 1         | 0      | 0      | 1      | 1       | 66.66     | 5       | 0.025     | 5       | 0.50    | 0.00    |           | 4.00      | 0        | 0         | 0     | 0     | 1     | 0         | 1         | 1           | 3      | 0           | 0          | 0     | 0      | 0 | 0 | 0 |   |   |
| 1      |            |             |             |         |             |           | 1         | 1      | 0      | 0      |         | 2         | 0.100   | 1         | 0.100   | 3.50    | 3.50    |           | 4.00      | 0        | 3         | 1     | 0     | 0     | 0         | 0         | 1           | 1      | 3           | 0          | 0     | 0      | 0 | 0 | 0 |   |   |
| 0      |            |             |             |         |             |           | 0         | 0      | 0      | 0      | 10      |           | 5       | -0.200    | 2       | 0.000   | 1.00    | 0.75      |           | 4.00     | 0         | 0     | 0     | 0     | 0         | 0         | 0           | 0      | 0           | 0          | 0     | 0      | 0 | 0 | 0 |   |   |
| 1      |            |             |             |         |             |           | 0         | 1      | 0      | 0      |         | 3         | 0.200   |           |         | 2.25    | 2.25    | 3         | 4.00      | 0        | 1         | 0     | 0     | 0     | 0         | 0         | 0           | 1      | 1           | 0          | 0     | 0      | 0 | 0 | 0 |   |   |
| 0      |            |             |             |         |             |           | 0         | 0      | 1      | 0      | 0       |           | 3       | 0.000     |         |         | 1.75    | 2.50      |           | 3.00     | 0         | 1     | 0     | 0     | 0         | 0         | 0           | 1      | 0           | 0          | 0     | 0      | 0 | 0 | 0 |   |   |
| 1      |            |             |             |         |             |           | 1         | 0      | 0      | 1      | 0       | 33.33     | 2       | 0.100     |         | -1.00   | -1.25   |           | 4.00      | 0        | 0         | 1     | 0     | 0     | 0         | 0         | 0           | 2      | 0           | 0          | 0     | 0      | 0 | 0 | 0 |   |   |
| 0      |            |             |             |         |             |           | 0         | 0      | 0      | 0      |         | 1         | 0.500   |           |         | -0.50   | -0.25   |           | 4.00      | 0        | 0         | 0     | 0     | 0     | 0         | 0         | 0           | 0      | 0           | 0          | 0     | 0      | 0 | 0 | 0 |   |   |
| 1      |            |             |             |         |             |           | 1         | 0      | 0      | 0      |         | 1         | 0.300   |           |         | 0.300   |         |           | 2.50      | 1        | 1         | 1     | 0     | 0     | 0         | 0         | 1           | 0      | 0           | 0          | 0     | 0      | 0 | 0 | 0 |   |   |
| 0      |            |             |             |         |             |           | 0         | 0      | 0      | 0      |         | 2         | 0.000   |           |         | 1.00    | -0.25   |           | 2.00      | 0        | 1         | 1     | 0     | 0     | 0         | 0         | 0           | 2      | 1           | 1          | 0     | 0      | 0 | 0 | 0 |   |   |
| 0      |            |             |             |         |             |           | 0         | 0      | 0      | 0      |         | 2         | 0.000   |           |         | 0.75    | 0.75    |           | 4.00      | 0        | 0         | 0     | 0     | 0     | 0         | 0         | 0           | 0      | 0           | 0          | 0     | 0      | 0 | 0 | 0 | 0 |   |
| 1      |            |             |             |         |             |           | 1         | 1      | 0      | 0      |         | 0         | 0.75    |           |         | -3.75   | -2.75   |           | 4.00      | 0        | 0         | 1     | 0     | 0     | 1         | 1         | 0           | 3      | 1           | 0          | 0     | 0      | 0 | 0 | 0 |   |   |
| 0      |            |             |             |         |             |           | 0         | 1      | 0      | 1      |         | 2         | 0.200   |           |         | 0.75    | 0.75    |           | 4.00      | 0        | 1         | 0     | 0     | 0     | 0         | 0         | 1           | 0      | 0           | 0          | 0     | 0      | 0 | 0 | 0 | 0 |   |
| 0      |            |             |             |         |             |           | 0         | 1      | 0      | 1      |         | 2         | 0.200   |           |         | 2.00    | 1.50    |           | 2.50      | 0        | 1         | 0     | 0     | 0     | 0         | 0         | 1           | 0      | 2           | 0          | 0     | 0      | 0 | 0 | 0 | 0 |   |
| 1      |            |             |             |         |             |           | 1         | 0      | 0      | 0      | 33.30   | 1         | 0.400   |           |         | 2.00    | 2.25    |           | 2.50      | 1        | 1         | 1     | 0     | 0     | 0         | 1         | 1           | 0      | 4           | 1          | 0     | 0      | 0 | 0 | 0 |   |   |
| 0      |            |             |             |         |             |           | 0         | 0      | 0      | 0      |         | 5         | -0.150  |           |         | 0.50    | 0.25    |           | 4.00      | 0        | 0         | 0     | 0     | 0     | 0         | 0         | 0           | 0      | 0           | 0          | 0     | 0      | 0 | 0 | 0 | 0 |   |
| 0      |            |             |             |         |             |           | 0         | 0      | 0      | 0      |         | 2         | 0.000   |           |         | 1.00    | 2.75    |           | 4.00      | 0        | 1         | 0     | 0     | 0     | 0         | 0         | 0           | 1      | 0           | 0          | 0     | 0      | 0 | 0 | 0 | 0 |   |
| 1      |            |             |             |         |             |           | 1         | 0      | 0      | 2      | 2       |           | 1       | 1.200     |         | 0.75    | 0.75    |           | 2.50      | 1        | 0         | 1     | 0     | 0     | 0         | 0         | 1           | 0      | 0           | 0          | 0     | 0      | 0 | 0 | 0 | 0 |   |
| 0      |            |             |             |         |             |           | 0         | 0      | 0      | 0      | 2       | 100.00    | 3       | -0.100    |         | 0.00    | 0.50    |           | 4.00      | 0        | 0         | 0     | 0     | 0     | 0         | 0         | 0           | 2      | 1           | 0          | 0     | 0      | 0 | 0 | 0 | 0 |   |
| 0      |            |             |             |         |             |           | 0         | 0      | 0      | 0      |         | 2         | 0.000   |           |         | -2.00   | -2.00   |           | 4.00      | 0        | 0         | 0     | 0     | 0     | 0         | 0         | 0           | 0      | 0           | 0          | 0     | 0      | 0 | 0 | 0 | 0 |   |
| 0      |            |             |             |         |             |           | 0         | 1      | 1      | 0      |         | 5         | -0.150  | 2         | 0.050   | 2.75    | 2.00    |           | 4.00      | 0        | 0         | 0     | 0     | 0     | 0         | 0         | 0           | 0      | 0           | 0          | 0     | 0      | 0 | 0 | 0 | 0 |   |
| 0      |            |             |             |         |             |           | 0         | 1      | 0      | 0      |         | 5         | -0.125  | 2         | 0.000   | -4.00   | -4.25   |           | 4.00      | 0        | 1         | 0     | 0     | 0     | 0         | 0         | 0           | 1      | 0           | 0          | 0     | 0      | 0 | 0 | 0 | 0 | 0 |
| 0      |            |             |             |         |             |           | 0         | 0      | 0      | 2      | 50.00   | 5         | -0.050  | 2         | 0.050   | 0.50    | -0.50   |           | 4.00      | 0        | 0         | 0     | 0     | 0     | 0         | 0         | 0           | 0      | 0           | 0          | 0     | 0      | 0 | 0 | 0 | 0 | 0 |
| 0      |            |             |             |         |             |           | 0         | 0      | 1      | 0      |         | 5         | -0.075  | 2         | 0.075   | 1.75    | 1.50    |           | 4.00      | 0        | 1         | 0     | 0     | 0     | 0         | 0         | 1           | 0      | 2           | 0          | 0     | 0      | 0 | 0 | 0 | 0 | 0 |
| 0      |            |             |             |         |             |           | 0         | 0      | 0      | 0      |         | 5         | -0.200  | 2         | 0.025   | 0.00    | -0.25   |           | 4.00      | 0        | 0         | 0     | 0     | 0     | 0         | 0         | 0           | 0      | 0           | 0          | 0     | 0      | 0 | 0 | 0 | 0 | 0 |
| 1      |            |             |             |         |             |           | 0         | 0      | 0      | 0      | 12.50   | 2         | 0.600   |           |         | 1.00    | 1.50    |           | 2.00      | 0        | 1         | 1     | 0     | 0     | 0         | 1         | 0           | 3      | 1           | 1          | 0     | 0      | 0 | 0 | 0 | 0 | 0 |
| 0      |            |             |             |         |             |           | 0         | 0      | 0      | 0      |         | 2         | 0.100   |           |         | -1.50   | -1.75   |           | 4.76      | 1        | 0         | 0     | 0     | 0     | 0         | 0         | 0           | 0      | 0           | 0          | 0     | 0      | 0 | 0 | 0 | 0 | 0 |
| 1      |            |             |             |         |             |           | 0         | 0      | 1      | 1      |         | 2         | 0.100   |           |         | -1.25   | -1.00   |           | 2.70      | 1        | 1         | 0     | 0     | 0     | 0         | 1         | 0           | 3      | 1           | 0          | 0     | 0      | 0 | 0 | 0 | 0 | 0 |
| 0      |            |             |             |         |             |           | 0         | 0      | 0      | 0      | 66.66   | 3         | 0.200   | 1         | 0.200   | 3.25    | 3.00    |           | 3.00      | 0        | 1         | 0     | 0     | 0     | 0         | 0         | 0           | 0      | 0           | 0          | 0     | 0      | 0 | 0 | 0 | 0 | 0 |
| 1      |            |             |             |         |             |           | 1         | 1      | 1      | 1      |         | 5         | 0.125   | 2         | 0.225   | 4.25    | 5.00    |           | 2.85      | 0        | 1         | 0     | 0     | 0     | 0         | 1         | 1           | 0      | 3           | 1          | 0     | 0      | 0 | 0 | 0 | 0 | 0 |
| 0      |            |             |             |         |             |           | 0         | 0      | 0      | 0      |         | 5         | 0.100   | 2         | 0.125   | 0.25    | -0.25   |           | 3.00      | 0        | 1         | 0     | 0     | 0     | 0         | 0         | 0           | 1      | 0           | 0          | 0     | 0      | 0 | 0 | 0 | 0 | 0 |
| 0      |            |             |             |         |             |           |           |        |        |        |         |           |         |           |         |         |         |           |           |          |           |       |       |       |           |           |             |        |             |            |       |        |   |   |   |   |   |





|   |   |   |   |   |   |   |   |   |   |   |   |    |    |    |    |    |   |   |   |    |    |   |
|---|---|---|---|---|---|---|---|---|---|---|---|----|----|----|----|----|---|---|---|----|----|---|
| 0 | 0 | 0 | 1 | 0 | 0 | 0 | 0 | 0 | 0 | 0 | 0 | 0  | 1  | 4  | 0  | 4  | 3 | 0 | 0 | 0  | 0  | 0 |
| 0 | 0 | 0 | 1 | 1 | 0 | 0 | 0 | 0 | 0 | 0 | 0 | 0  | 1  | 4  | 0  | 0  | 5 | 2 | 0 | 0  | 0  | 0 |
| 0 | 0 | 1 | 1 | 1 | 0 | 0 | 0 | 0 | 0 | 0 | 0 | 1  | 7  | 1  | 0  | 10 | 0 | 0 | 0 | 0  | 0  | 0 |
| 0 | 0 | 0 | 0 | 0 | 0 | 0 | 0 | 0 | 0 | 0 | 0 | 0  | 8  | 2  | 0  | 0  | 0 | 0 | 0 | 0  | 0  | 0 |
| 0 | 0 | 0 | 0 | 0 | 0 | 0 | 0 | 0 | 0 | 0 | 0 | 0  | 8  | 5  | 0  | 1  | 3 | 0 | 0 | 0  | 0  | 0 |
| 0 | 0 | 0 | 0 | 0 | 0 | 0 | 0 | 0 | 0 | 0 | 0 | 0  | 6  | 4  | 2  | 3  | 0 | 0 | 0 | 0  | 0  | 0 |
| 0 | 0 | 1 | 1 | 0 | 0 | 0 | 0 | 0 | 0 | 0 | 0 | 1  | 8  | 4  | 5  | 2  | 0 | 0 | 0 | 0  | 0  | 0 |
| 0 | 0 | 1 | 1 | 1 | 0 | 0 | 0 | 0 | 0 | 0 | 0 | 1  | 6  | 2  | 5  | 3  | 0 | 5 | 0 | 0  | 0  | 1 |
| 0 | 0 | 0 | 0 | 0 | 0 | 0 | 0 | 0 | 0 | 0 | 0 | 0  | 3  | 17 | 0  | 10 | 6 | 0 | 0 | 0  | 0  | 0 |
| 0 | 0 | 0 | 1 | 0 | 0 | 0 | 0 | 0 | 0 | 0 | 0 | 0  | 3  | 1  | 2  | 0  | 0 | 1 | 0 | 2  | 0  | 0 |
| 0 | 0 | 0 | 1 | 0 | 0 | 0 | 0 | 0 | 0 | 0 | 0 | 0  | 6  | 4  | 4  | 4  | 0 | 0 | 0 | 7  | 0  | 0 |
| 0 | 0 | 0 | 1 | 0 | 0 | 0 | 0 | 0 | 0 | 0 | 0 | 0  | 7  | 3  | 1  | 3  | 0 | 0 | 0 | 0  | 0  | 0 |
| 0 | 0 | 0 | 0 | 0 | 0 | 0 | 0 | 0 | 0 | 0 | 0 | 0  | 2  | 4  | 0  | 0  | 0 | 0 | 0 | 0  | 0  | 0 |
| 0 | 0 | 3 | 3 | 0 | 0 | 0 | 0 | 0 | 0 | 0 | 0 | 0  | 5  | 3  | 1  | 2  | 7 | 0 | 0 | 2  | 0  | 0 |
| 0 | 0 | 0 | 1 | 0 | 0 | 0 | 0 | 0 | 0 | 0 | 0 | 0  | 0  | 9  | 2  | 2  | 0 | 0 | 0 | 0  | 0  | 0 |
| 0 | 0 | 0 | 1 | 0 | 0 | 0 | 0 | 0 | 0 | 0 | 0 | 0  | 1  | 0  | 0  | 1  | 0 | 0 | 2 | 0  | 0  | 0 |
| 0 | 0 | 0 | 0 | 0 | 0 | 0 | 0 | 0 | 0 | 0 | 0 | 0  | 3  | 9  | 1  | 0  | 1 | 1 | 0 | 0  | 0  | 0 |
| 0 | 0 | 0 | 0 | 0 | 0 | 0 | 0 | 0 | 0 | 0 | 0 | 0  | 3  | 7  | 0  | 2  | 0 | 1 | 0 | 0  | 0  | 0 |
| 0 | 0 | 0 | 0 | 0 | 0 | 0 | 0 | 0 | 0 | 0 | 0 | 0  | 3  | 5  | 3  | 1  | 0 | 2 | 0 | 0  | 0  | 0 |
| 0 | 0 | 1 | 1 | 1 | 0 | 0 | 0 | 0 | 0 | 0 | 0 | 1  | 1  | 5  | 2  | 2  | 0 | 0 | 0 | 3  | 2  | 0 |
| 1 | 0 | 3 | 4 | 0 | 0 | 0 | 0 | 0 | 0 | 0 | 0 | 3  | 1  | 0  | 0  | 0  | 3 | 0 | 1 | 2  | 0  | 0 |
| 0 | 0 | 2 | 2 | 0 | 0 | 0 | 0 | 0 | 0 | 0 | 0 | 2  | 4  | 0  | 2  | 4  | 0 | 2 | 0 | 0  | 0  | 0 |
| 0 | 0 | 0 | 1 | 0 | 0 | 0 | 0 | 0 | 0 | 0 | 0 | 5  | 11 | 0  | 1  | 1  | 0 | 0 | 0 | 0  | 0  | 0 |
| 0 | 0 | 1 | 2 | 0 | 0 | 0 | 0 | 0 | 0 | 0 | 0 | 3  | 3  | 4  | 1  | 3  | 0 | 0 | 0 | 0  | 0  | 0 |
| 0 | 0 | 0 | 1 | 0 | 0 | 0 | 0 | 0 | 0 | 0 | 0 | 0  | 2  | 3  | 1  | 0  | 0 | 0 | 0 | 0  | 0  | 0 |
| 0 | 0 | 0 | 0 | 0 | 0 | 0 | 0 | 0 | 0 | 0 | 0 | 0  | 9  | 13 | 4  | 0  | 0 | 3 | 0 | 0  | 0  | 0 |
| 0 | 0 | 0 | 0 | 0 | 0 | 0 | 0 | 0 | 0 | 0 | 0 | 0  | 1  | 3  | 0  | 6  | 5 | 0 | 0 | 4  | 10 | 0 |
| 0 | 0 | 0 | 1 | 0 | 0 | 0 | 0 | 0 | 0 | 0 | 0 | 3  | 3  | 0  | 3  | 0  | 0 | 0 | 0 | 3  | 0  | 0 |
| 0 | 0 | 0 | 1 | 0 | 0 | 0 | 0 | 0 | 0 | 0 | 0 | 10 | 0  | 1  | 0  | 0  | 0 | 0 | 0 | 0  | 0  | 0 |
| 0 | 0 | 0 | 0 | 0 | 0 | 0 | 0 | 0 | 0 | 0 | 0 | 3  | 5  | 0  | 0  | 2  | 6 | 0 | 0 | 0  | 0  | 1 |
| 0 | 0 | 0 | 1 | 0 | 0 | 0 | 0 | 0 | 0 | 0 | 0 | 1  | 2  | 6  | 0  | 0  | 4 | 0 | 0 | 0  | 0  | 0 |
| 0 | 0 | 0 | 0 | 0 | 0 | 0 | 0 | 0 | 0 | 0 | 0 | 0  | 1  | 4  | 4  | 0  | 0 | 0 | 0 | 0  | 0  | 0 |
| 0 | 0 | 0 | 0 | 0 | 0 | 0 | 0 | 0 | 0 | 0 | 0 | 0  | 3  | 0  | 8  | 1  | 3 | 0 | 0 | 3  | 1  | 0 |
| 0 | 0 | 0 | 0 | 0 | 0 | 0 | 0 | 0 | 0 | 0 | 0 | 5  | 9  | 2  | 0  | 0  | 2 | 0 | 0 | 0  | 0  | 0 |
| 0 | 0 | 0 | 0 | 0 | 0 | 0 | 0 | 0 | 0 | 0 | 0 | 0  | 2  | 3  | 0  | 2  | 3 | 0 | 0 | 0  | 0  | 1 |
| 0 | 0 | 1 | 1 | 0 | 0 | 0 | 1 | 0 | 0 | 0 | 1 | 1  | 3  | 9  | 3  | 1  | 2 | 0 | 0 | 0  | 0  | 0 |
| 0 | 0 | 0 | 1 | 0 | 0 | 0 | 0 | 0 | 0 | 0 | 0 | 1  | 6  | 2  | 1  | 4  | 0 | 0 | 0 | 0  | 0  | 0 |
| 0 | 0 | 0 | 0 | 0 | 0 | 0 | 0 | 0 | 0 | 0 | 0 | 6  | 5  | 3  | 3  | 6  | 2 | 0 | 5 | 0  | 0  | 0 |
| 0 | 0 | 0 | 0 | 0 | 0 | 0 | 0 | 0 | 0 | 0 | 0 | 0  | 1  | 0  | 0  | 3  | 1 | 0 | 0 | 0  | 0  | 0 |
| 0 | 0 | 1 | 1 | 0 | 0 | 0 | 0 | 0 | 0 | 0 | 0 | 5  | 2  | 2  | 6  | 0  | 0 | 0 | 0 | 0  | 0  | 0 |
| 0 | 0 | 1 | 1 | 0 | 0 | 0 | 0 | 0 | 0 | 0 | 0 | 5  | 3  | 1  | 5  | 0  | 0 | 0 | 0 | 0  | 0  | 0 |
| 0 | 0 | 2 | 3 | 1 | 0 | 0 | 0 | 0 | 0 | 1 | 1 | 0  | 7  | 3  | 2  | 4  | 2 | 0 | 0 | 0  | 0  | 0 |
| 0 | 0 | 1 | 2 | 0 | 0 | 0 | 0 | 0 | 0 | 0 | 0 | 5  | 8  | 0  | 0  | 4  | 2 | 3 | 1 | 0  | 0  | 0 |
| 0 | 0 | 0 | 0 | 0 | 0 | 0 | 0 | 0 | 0 | 0 | 0 | 4  | 0  | 3  | 0  | 2  | 0 | 1 | 2 | 0  | 0  | 0 |
| 0 | 0 | 0 | 0 | 0 | 0 | 0 | 0 | 0 | 0 | 0 | 0 | 7  | 3  | 1  | 2  | 8  | 0 | 0 | 0 | 0  | 0  | 0 |
| 0 | 0 | 0 | 0 | 0 | 0 | 0 | 0 | 0 | 0 | 0 | 0 | 3  | 2  | 1  | 0  | 0  | 0 | 0 | 0 | 0  | 0  | 0 |
| 0 | 0 | 0 | 0 | 0 | 0 | 0 | 0 | 0 | 0 | 0 | 0 | 8  | 2  | 1  | 3  | 1  | 0 | 1 | 2 | 0  | 0  | 0 |
| 0 | 0 | 0 | 1 | 0 | 0 | 0 | 0 | 0 | 0 | 0 | 0 | 0  | 0  | 0  | 0  | 0  | 0 | 0 | 0 | 0  | 0  | 0 |
| 0 | 0 | 1 | 1 | 0 | 0 | 0 | 0 | 0 | 0 | 0 | 0 | 1  | 0  | 0  | 0  | 0  | 0 | 0 | 0 | 0  | 0  | 0 |
| 0 | 0 | 0 | 0 | 0 | 0 | 0 | 0 | 0 | 0 | 0 | 0 | 9  | 9  | 0  | 2  | 0  | 0 | 0 | 0 | 0  | 0  | 0 |
| 0 | 0 | 1 | 1 | 0 | 0 | 0 | 0 | 0 | 0 | 0 | 0 | 4  | 1  | 2  | 0  | 2  | 0 | 1 | 3 | 9  | 5  | 0 |
| 0 | 0 | 0 | 0 | 0 | 0 | 0 | 0 | 0 | 0 | 0 | 0 | 3  | 1  | 2  | 0  | 0  | 0 | 0 | 0 | 0  | 0  | 0 |
| 0 | 0 | 0 | 0 | 0 | 0 | 0 | 0 | 0 | 0 | 0 | 0 | 0  | 0  | 0  | 10 | 0  | 0 | 1 | 0 | 0  | 0  | 0 |
| 0 | 0 | 0 | 0 | 0 | 0 | 0 | 0 | 0 | 0 | 0 | 0 | 0  | 0  | 2  | 7  | 0  | 0 | 0 | 0 | 0  | 0  | 6 |
| 0 | 0 | 0 | 0 | 0 | 0 | 0 | 0 | 0 | 0 | 0 | 0 | 0  | 0  | 1  | 32 | 7  | 1 | 0 | 0 | 0  | 8  | 9 |
| 0 | 0 | 0 | 0 | 0 | 0 | 0 | 0 | 0 | 0 | 0 | 0 | 3  | 3  | 6  | 7  | 0  | 0 | 0 | 0 | 0  | 3  | 0 |
| 0 | 0 | 1 | 2 | 0 | 0 | 0 | 0 | 0 | 0 | 0 | 0 | 1  | 0  | 5  | 9  | 2  | 2 | 0 | 1 | 0  | 4  | 0 |
| 0 | 0 | 0 | 0 | 0 | 0 | 0 | 0 | 0 | 0 | 0 | 0 | 10 | 4  | 0  | 10 | 0  | 0 | 0 | 1 | 0  | 0  | 0 |
| 0 | 0 | 0 | 1 | 0 | 0 | 0 | 0 | 0 | 0 | 0 | 0 | 2  | 2  | 0  | 9  | 1  | 0 | 0 | 9 | 10 | 0  | 0 |
| 0 | 0 | 1 | 1 | 0 | 0 | 0 | 0 | 0 | 0 | 0 | 0 | 2  | 1  | 2  | 0  | 0  | 1 | 0 | 4 | 0  | 0  | 0 |
| 0 | 0 | 0 | 1 | 0 | 0 | 0 | 0 | 0 | 0 | 0 | 0 | 4  | 2  | 7  | 4  | 0  | 1 | 0 | 0 | 1  | 0  | 0 |
| 0 | 0 | 0 | 1 | 0 | 0 | 0 | 0 | 0 | 0 | 0 | 0 | 1  | 1  | 5  | 1  | 0  | 0 | 0 | 0 | 0  | 0  | 0 |
| 0 | 0 | 1 | 2 | 0 | 0 | 0 | 0 | 0 | 0 | 0 | 0 | 2  | 1  | 5  | 0  | 0  | 0 | 0 | 0 | 0  | 0  | 0 |
| 0 | 0 | 2 | 3 | 0 | 0 | 0 | 0 | 0 | 0 | 0 | 0 | 6  | 0  | 3  | 8  | 0  | 2 | 0 | 0 | 0  | 0  | 0 |
| 0 | 0 | 0 | 0 | 0 | 0 | 0 | 0 | 0 | 0 | 0 | 0 | 0  | 0  | 0  | 4  | 3  | 0 | 0 | 0 | 0  | 0  | 0 |
| 0 | 0 | 0 | 0 | 0 | 0 | 0 | 0 | 0 | 0 | 0 | 0 | 0  | 0  | 7  | 6  | 4  | 4 | 0 | 0 | 0  | 3  | 0 |
| 0 | 0 | 0 | 0 | 0 | 0 | 0 | 0 | 0 | 0 | 0 | 0 | 2  | 5  | 1  | 0  | 1  | 0 | 2 | 0 | 0  | 0  | 3 |
| 0 | 0 | 1 | 1 | 0 | 0 | 0 | 0 | 0 | 0 | 0 | 0 | 3  | 3  | 4  | 6  | 2  | 0 | 1 | 0 | 0  | 0  | 0 |
| 0 | 0 | 0 | 0 | 0 | 0 | 0 | 0 | 0 | 0 | 0 | 0 | 3  | 0  | 0  | 5  | 0  | 0 | 0 | 0 | 0  | 0  | 0 |
| 0 | 0 | 0 | 0 | 1 | 0 | 0 | 0 | 0 | 0 | 0 | 0 | 1  | 7  | 1  | 0  | 0  | 0 | 3 | 0 | 0  | 0  | 0 |
| 0 | 0 | 0 | 0 | 0 | 0 | 0 | 0 | 0 | 0 | 0 | 0 | 3  | 0  | 1  | 0  | 0  | 1 | 0 | 3 | 0  | 0  | 2 |
| 0 | 0 | 0 | 0 | 0 | 0 | 0 | 0 | 0 | 0 | 0 | 0 | 11 | 5  | 5  | 0  | 0  | 0 | 0 | 0 | 0  | 1  | 0 |
| 0 | 0 | 0 | 0 | 0 | 0 | 0 | 0 | 0 | 0 | 0 | 0 | 7  | 10 | 18 | 0  | 0  | 0 | 0 | 0 | 0  | 0  | 0 |
| 0 | 0 | 0 | 0 | 0 | 0 | 0 | 0 | 0 | 0 | 0 | 0 | 1  | 0  | 15 | 1  | 5  | 0 | 1 | 8 | 7  | 0  | 0 |
| 0 | 0 | 2 | 2 | 1 | 1 | 0 | 0 | 0 | 0 | 2 | 2 | 0  | 2  | 5  | 3  | 0  | 1 | 0 | 0 | 7  | 9  | 0 |
| 0 | 0 | 0 | 0 | 0 | 0 | 0 | 0 | 0 | 0 | 0 | 0 | 0  | 0  | 0  | 0  | 0  | 0 | 0 | 0 | 0  | 0  | 0 |
| 0 | 0 | 0 | 0 | 0 | 0 | 0 | 0 | 0 | 0 | 0 | 0 | 0  | 14 | 8  | 1  | 0  | 8 | 0 | 0 | 1  | 0  | 0 |
| 0 | 0 | 1 | 1 | 0 | 0 | 1 | 0 | 0 | 0 | 1 | 1 | 0  | 6  | 2  | 1  | 22 | 1 | 0 | 0 | 0  | 0  | 0 |
| 0 | 0 | 0 | 0 | 0 | 0 | 0 | 0 | 0 | 0 | 0 | 0 | 4  | 0  | 0  | 1  | 0  | 0 | 0 | 1 | 0  | 0  | 0 |
| 1 | 0 | 2 | 2 | 1 | 0 | 0 | 0 | 0 | 1 | 0 | 0 | 2  | 2  | 0  | 6  | 3  | 0 | 2 | 3 | 0  | 0  | 0 |
| 0 | 0 | 0 | 1 | 0 | 0 | 0 | 0 | 0 | 0 | 0 | 0 | 3  | 2  | 1  | 0  | 1  | 0 | 0 | 0 | 0  | 0  | 0 |
| 0 | 0 | 0 | 0 | 0 | 0 | 0 | 0 | 0 | 0 | 0 | 0 | 9  | 3  | 3  | 3  | 0  | 0 | 0 | 0 | 0  | 0  | 0 |
| 0 | 0 | 0 | 0 | 0 | 0 | 0 | 0 | 0 | 0 | 0 | 0 | 2  | 1  | 10 | 0  | 2  | 1 | 0 | 0 | 0  | 0  | 0 |
| 0 | 0 | 0 | 0 | 0 | 0 | 0 | 0 | 0 | 0 | 0 | 0 | 4  | 0  | 3  | 8  | 1  | 0 | 0 | 0 | 0  | 0  | 0 |
| 0 | 1 | 3 | 4 | 1 | 1 | 0 | 0 | 0 | 1 | 3 | 4 | 1  | 1  | 11 | 20 | 1  | 0 | 0 | 0 | 0  | 0  | 0 |
| 0 | 0 | 0 | 0 | 0 | 0 | 0 | 0 | 0 | 0 | 0 | 0 | 1  | 16 | 5  | 3  | 0  | 0 | 0 | 0 | 2  | 0  | 0 |
| 0 | 0 | 0 | 0 | 0 |   |   |   |   |   |   |   |    |    |    |    |    |   |   |   |    |    |   |
